# Supplementary material for: Polycomb complex protein BMI-1 promotes invasion and metastasis of pancreatic cancer stem cells by activating PI3K/AKT signaling, an ex vivo, in vitro, and in vivo study
Source: PubMed Central journal article supplement (PMC4891062; doi:10.18632/oncotarget.7078), 2016-01-30
Supplement: oncotarget-07-9586-s001.pdf [file oncotarget-07-9586-s001.pdf]

## SUPPLEMENTARY FIGURES

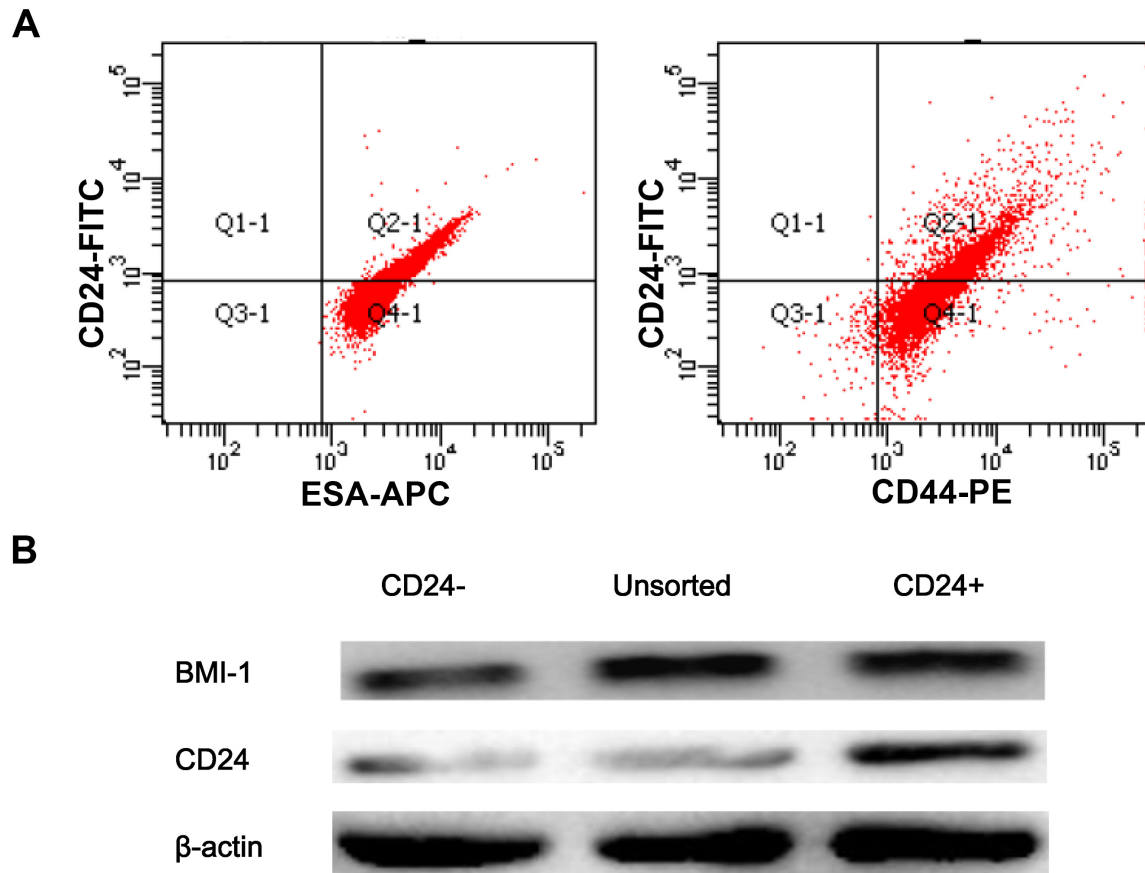

**Supplementary Figure S1: BMI-1 expression in CD24+ Colo357 cells sorted by MACS.** **A.** Flow cytometric analysis of CD24, CD44 and ESA expression in Colo357 cells. **B.** BMI-1 expression in CD24+ cells had no difference compared with CD24- or unsorted Colo357 cells.

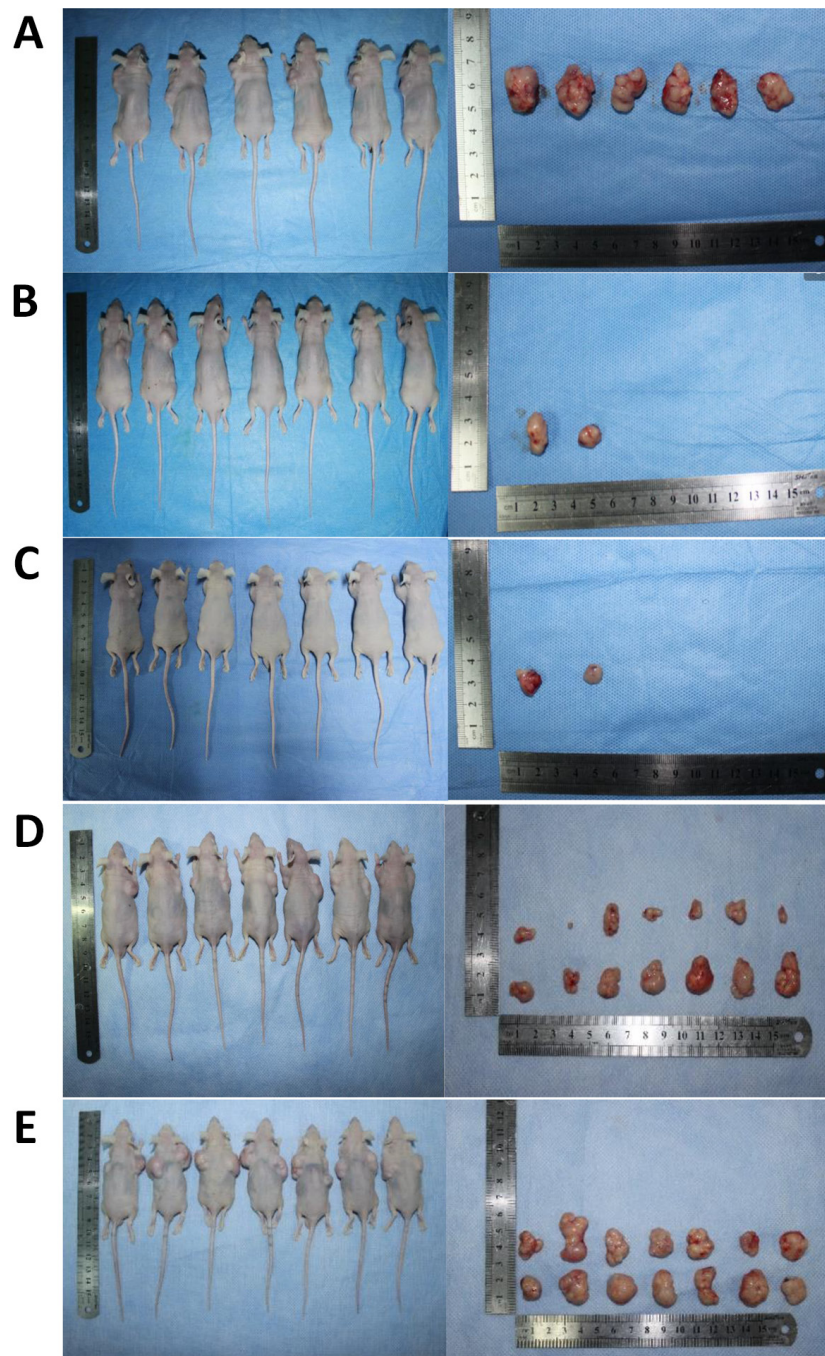

**Supplementary Figure S2: The tumor formation ability of CD133+, unsorted and CD133- cells.** A.  $10^4$  CD133+ cells and  $10^4$  CD133- cells were injected into SCID mice on the left and right flanks, respectively. B. Left,  $10^5$  CD133- cells; Right,  $10^6$  CD133- cells. C. Left,  $10^4$  unsorted cells; Right,  $10^5$  unsorted cells. D. Left,  $10^7$  CD133- cells; Right,  $10^6$  unsorted cells. E. Left,  $10^7$  unsorted cells; Right,  $10^4$  CD133+ cells. The upper tissue specimens were obtained from left flanks.

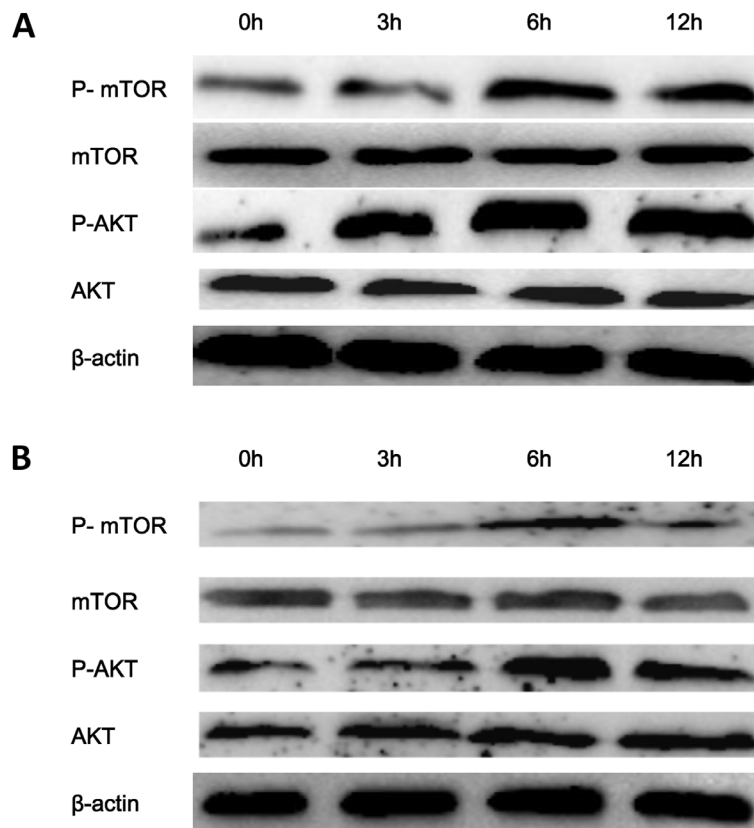

**Supplementary Figure S3: Expression of PI3K/AKT signaling pathway molecules at 0, 3, 6 and 12 hours after addition of IGF-1. A.** Expression of PI3K/AKT signaling pathway molecules of Colo357 cells. **B.** Expression of PI3K/AKT signaling pathway molecules of SW1990 cells.
